# Supplementary material for: Exactly solvable 1D model explains the low-energy vibrational level structure of protonated methane
Source: Royal Society of Chemistry journal article supplement (doi:10.1039/d1cc01214b), 2021-01-01
Supplement: d1cc01214b1.pdf [file d1cc01214b1.pdf]

**Supplementary Information for:**  
**Exactly solvable 1D model explains the low-energy vibrational  
level structure of protonated methane**

Jonathan I. Rawlinson\*

*School of Mathematics, University of Bristol, Bristol, UK*

Csaba Fábri and Attila G. Császár

*Laboratory of Molecular Structure and Dynamics,  
Institute of Chemistry, Eötvös Loránd University,  
Pázmány Péter sétány 1/A, H-1117 Budapest, Hungary and  
MTA-ELTE Complex Chemical Systems Research Group,  
P.O. Box 32, H-1518 Budapest 112, Hungary*

## I. SOLVING MOTION ON THE QUANTUM GRAPH

In what follows, we provide a concise summary of the working equations of quantum-graph theory [1] relevant to the  $\text{CH}_5^+$  problem. The Hamiltonian describing the one-dimensional (1D) free motion of a particle confined to a quantum graph is

$$\hat{H} = -\frac{1}{2} \frac{d^2}{dx^2}, \quad (1)$$

where  $x$  refers to mass-scaled local coordinate defined along the edges of the quantum graph and atomic units are implied. The eigenfunctions of  $\hat{H}$  along the  $j$ th edge are superpositions of outgoing and incoming one-dimensional plane waves,

$$\psi_j(x) = a_j \exp(ikx) + b_j \exp(ik(L_j - x)), \quad (2)$$

where  $L_j$  denotes the length of the  $j$ th edge,  $x \in [0, L_j]$ , and the energy eigenvalue corresponding to  $\psi_j(x)$  is  $E_k = k^2/2$ . The energy levels are quantized by the Neumann boundary conditions,[1]

$$\begin{aligned} \psi_1(0) = \psi_2(0) = \dots = \psi_{d_l}(0) \\ \sum_{\alpha=1}^{d_l} \left. \frac{d\psi_\alpha}{dx} \right|_{x=0} = 0, \end{aligned} \quad (3)$$

where  $\alpha = 1, \dots, d_l$  labels edges attached to the  $l$ th vertex of degree  $d_l$ . The first and second sets of boundary conditions in Eq. (3) imply the continuity of the wave function and the conservation of the quantum flux at the  $l$ th vertex, respectively. Substituting  $\psi_j(x)$  into Eq. (3) yields

$$\begin{aligned} a_1 + b_1 \exp(ikL_1) = a_2 + b_2 \exp(ikL_2) = \dots = a_{d_l} + b_{d_l} \exp(ikL_{d_l}) \\ \sum_{\alpha=1}^{d_l} [a_\alpha - b_\alpha \exp(ikL_\alpha)] = 0, \end{aligned} \quad (4)$$

or equivalently,

$$\begin{aligned} \sum_{\alpha=1}^{d_l} [a_\alpha + b_\alpha \exp(ikL_\alpha)] = d_l (a_\beta + b_\beta \exp(ikL_\beta)) \\ \sum_{\alpha=1}^{d_l} [a_\alpha - b_\alpha \exp(ikL_\alpha)] = 0, \end{aligned} \quad (5)$$

where  $\beta = 1, \dots, d_l$ . The difference of the first and second equations of Eq. (5) can be rearranged to

$$\frac{2}{d_l} \sum_{\alpha=1, \alpha \neq \beta}^{d_l} \exp(ikL_\alpha) b_\alpha + \left( \frac{2}{d_l} - 1 \right) \exp(ikL_\beta) b_\beta = a_\beta. \quad (6)$$

Equation (6) is equivalent to imposing the Neumann boundary conditions on the quantum graph eigenstates at a given vertex. The full set of these equations written for all vertices correspond to an eigenvalue problem of the unitary matrix  $\mathbf{S}(k)$ , whose matrix elements are determined by the connectivity of the graph and the complex factors  $\exp(ikL_\alpha)$ . Note that the eigenvalue in Eq. (6) equals  $\lambda = 1$  and the eigenvectors contain the amplitudes  $a_j$  and  $b_j$ . Thus, the quantum graph can be solved by finding  $k$  values for which  $\mathbf{S}(k)$  has at least one eigenvalue of  $\lambda = 1$ .

## II. VIBRATIONAL ENERGY LEVELS OF $\text{CH}_5^+$

Table I of the Supporting Information provides the full set of vibrational energy levels of  $\text{CH}_5^+$ , corresponding to the lowest 60 states, referenced in the manuscript. The numerically-exact variational vibrational energy levels computed with seven-dimensional (7D) bend and full-dimensional (12D) vibrational models are taken from Refs. 2, 3, and 4. The quantum-graph vibrational energy levels were computed by solving the Schrödinger equation for the quantum graph  $\Gamma_{120}$  using the method presented in Section I. The rotation and flip edge length values of  $\Gamma_{120}$  were obtained by fitting the quantum-graph levels to their 7D and 12D variational counterparts.[5, 6] The fit resulted in the edge length values  $L_{\text{rot}} = 61.2\sqrt{m_e}a_0$  and  $L_{\text{flip}} = 1.0\sqrt{m_e}a_0$  (fit to 7D variational levels), and  $L_{\text{rot}} = 62.5\sqrt{m_e}a_0$  and  $L_{\text{flip}} = 4.5\sqrt{m_e}a_0$  (fit to 12D variational levels).

## III. CONSIDERATIONS FOR THE QUANTUM GRAPHS $\Gamma_{120}$ AND $\Gamma_{60}$

Let us consider two vertices that are connected by a flip edge of  $\Gamma_{120}$ . The selected flip edge is referred to as edge 1 and the four rotation edges attached to the two endpoints of edge 1 are labeled by 2, 3, 4 and 5. As we are primarily interested in vibrational energy levels lower than  $E_{\text{max}} = 300 \text{ cm}^{-1}$ , the maximal value of  $k$  equals  $k_{\text{max}} = \sqrt{2E_{\text{max}}} = 0.0523$ . If  $0 \leq k \leq k_{\text{max}}$  and  $L_{\text{flip}} = 1.0\sqrt{m_e}a_0$  (7D fit), one can show that the wave function  $\psi_1(x)$

Table I. Low-lying vibrational energy levels (in  $\text{cm}^{-1}$ ) of  $\text{CH}_5^+$  with  $S_5^*$  symmetry labels ( $\Gamma$ ). The 7D bend and 12D variational vibrational energy levels, 7D(VAR) and 12D(VAR), respectively, are compared to their counterparts obtained by two quantum-graph models, 7D(QG) and 12D(QG).

| $\Gamma$ | 7D(VAR) | 7D(QG) | 12D(VAR) | 12D(QG) |
|----------|---------|--------|----------|---------|
| $A_1^+$  | 0.0     | 0.0    | 0.0      | 0.0     |
| $G_2^-$  | 9.8     | 11.4   | 10.4     | 10.3    |
| $H_1^+$  | 20.3    | 22.2   | 21.7     | 20.5    |
| $H_2^-$  | 41.1    | 39.6   | 39.8     | 36.4    |
| $G_1^+$  | 49.3    | 44.8   | 39.3     | 38.7    |
| $I^-$    | 58.2    | 49.7   | 47.3     | 44.1    |
| $H_2^+$  | 59.1    | 50.2   | 52.3     | 45.9    |
| $I^+$    | 111.4   | 95.2   | 89.4     | 84.6    |
| $G_2^-$  | 112.3   | 100.9  | 85.6     | 87.4    |
| $H_1^-$  | 113.4   | 96.0   | 96.2     | 87.5    |
| $H_1^+$  | 121.3   | 112.4  | 106.5    | 102.8   |
| $H_2^-$  | 139.1   | 148.7  | 137.1    | 137.4   |
| $G_1^+$  | 154.2   | 182.0  | 153.0    | 165.1   |
| $A_2^-$  | 197.8   | 284.5  | n/a      | 258.3   |

along edge 1 is constant to a good approximation, that is,

$$\psi_1(x) \approx a_1 + b_1 \quad (7)$$

and

$$\frac{d\psi_1}{dx} \approx 0. \quad (8)$$

Under these assumptions the Neumann boundary conditions for the two vertices attached to edge 1 become equivalent to

$$\begin{aligned} \psi_2(0) = \psi_3(0) = \psi_4(0) = \psi_5(0) \\ \sum_{\alpha=2}^5 \frac{d\psi_\alpha}{dx} \Big|_{x=0} = 0, \end{aligned} \quad (9)$$

which are the boundary conditions of the  $\Gamma_{60}$  vertex  $\gamma$  we get by shrinking the length of edge 1 ( $L_{\text{flip}}$ ) to zero. Note that the degree of each  $\Gamma_{60}$  vertex is four and each edge of  $\Gamma_{60}$

has the same length ( $l$ ). For this special case Eq. (5) becomes

$$\begin{aligned} \sum_{\alpha=2}^5 [a_{\alpha} + b_{\alpha} \exp(ikl)] &= 4[a_{\beta} + b_{\beta} \exp(ikl)], \\ \sum_{\alpha=2}^5 [a_{\alpha} - b_{\alpha} \exp(ikl)] &= 0, \end{aligned} \tag{10}$$

which can be readily rearranged to

$$\begin{aligned} \sum_{\alpha=2}^5 a_{\alpha} &= 2[a_{\beta} + b_{\beta} \exp(ikl)], \\ \sum_{\alpha=2}^5 b_{\alpha} &= 2[a_{\beta} \exp(-ikl) + b_{\beta}], \end{aligned} \tag{11}$$

where  $\beta = 2, \dots, 5$ . Next, we evaluate the wave functions at the vertex  $\gamma$  ( $x = 0$ ),

$$\psi_{\alpha}(0) = a_{\alpha} + b_{\alpha} \exp(ikl) \tag{12}$$

and its four neighbours ( $x = l$ ),

$$\psi_{\alpha}(l) = a_{\alpha} \exp(ikl) + b_{\alpha}. \tag{13}$$

Summing the wave function values  $\psi_{\alpha}(l)$  and taking into account the relations in Eq. (11) results in

$$\sum_{\alpha=2}^5 \psi_{\alpha}(l) = \sum_{\alpha=2}^5 [a_{\alpha} \exp(ikl) + b_{\alpha}] = 4 \cos(kl) [a_{\beta} + b_{\beta} \exp(ikl)] = 4 \cos(kl) \psi_{\beta}(0), \tag{14}$$

which corresponds to a row of the eigenvalue equation of the  $\Gamma_{60}$  adjacency matrix  $\mathbf{A}$ . Repeating the same procedure for each  $\Gamma_{60}$  vertex reveals that vectors containing the wave function values at each vertex are eigenvectors of  $\mathbf{A}$  with the eigenvalues

$$\lambda = 4 \cos(kl) = 4 \cos(\sqrt{2El}), \tag{15}$$

which completes the proof of Eq. (4) of the manuscript.

Next, we prove that the spectrum of a bipartite graph is symmetric with respect to zero. For bipartite graphs the set of vertices can be divided into two disjoint and independent sets A and B such that every edge connects a vertex in A to one in B. Consequently, the adjacency matrix  $\mathbf{A}$  of a bipartite graph can be written as

$$\mathbf{A} = \begin{pmatrix} \mathbf{0}_A & \mathbf{a} \\ \mathbf{a}^T & \mathbf{0}_B \end{pmatrix}, \tag{16}$$

where  $\mathbf{a}$  is a  $|A| \times |B|$  matrix uniquely representing the bipartite graph and  $\mathbf{0}_A$  and  $\mathbf{0}_B$  denote  $|A| \times |A|$  and  $|B| \times |B|$  zero matrices. If  $\mathbf{v}$  is an eigenvector of  $\mathbf{A}$  with  $\lambda$  being the corresponding eigenvalue, that is,

$$\mathbf{A}\mathbf{v} = \begin{pmatrix} \mathbf{0}_A & \mathbf{a} \\ \mathbf{a}^T & \mathbf{0}_B \end{pmatrix} \begin{pmatrix} \mathbf{v}_1 \\ \mathbf{v}_2 \end{pmatrix} = \lambda \begin{pmatrix} \mathbf{v}_1 \\ \mathbf{v}_2 \end{pmatrix} = \lambda\mathbf{v}, \quad (17)$$

it is easy to see that the relation

$$\begin{pmatrix} \mathbf{0}_A & \mathbf{a} \\ \mathbf{a}^T & \mathbf{0}_B \end{pmatrix} \begin{pmatrix} \mathbf{v}_1 \\ -\mathbf{v}_2 \end{pmatrix} = -\lambda \begin{pmatrix} \mathbf{v}_1 \\ -\mathbf{v}_2 \end{pmatrix} \quad (18)$$

holds, meaning that  $-\lambda$  is also an eigenvalue of  $\mathbf{A}$ .

#### IV. RELATION BETWEEN $S_5^*$ REPRESENTATIONS UNDER $\lambda \rightarrow -\lambda$ SYMMETRY

Consider an eigenspace  $V_\lambda$  for  $\mathbf{A}$  with eigenvalue  $\lambda$ .  $S_5^*$  acts on  $V_\lambda$  as a symmetry by permutation of the protons and spatial inversion. Note that permutations which are odd send vertices in A to vertices in B (and vice versa), while permutations which are even send vertices in A to vertices in A and vertices in B to vertices in B. This can easily be seen from the graph, since the vertices directly connected to a given vertex are all related to the given vertex by an odd permutation of the protons. It follows that even permutations  $\pi \in S_5$  acts as matrices of the block-diagonal form

$$R(\pi) = \begin{pmatrix} \pi_{AA} & 0 \\ 0 & \pi_{BB} \end{pmatrix} \quad (19)$$

while odd permutations  $\pi \in S_5$  act as matrices of the form

$$R(\pi) = \begin{pmatrix} 0 & \pi_{AB} \\ \pi_{BA} & 0 \end{pmatrix}. \quad (20)$$

Similarly, it can be seen that spatial inversion  $E^* \in S_5^*$  always maps A to B and B to A and so acts as a matrix of the form

$$R(E^*) = \begin{pmatrix} 0 & \pi_{AB} \\ \pi_{BA} & 0 \end{pmatrix}. \quad (21)$$

Now introduce a map  $\hat{T}$  defined by

$$\hat{T} : \begin{pmatrix} \mathbf{v}_A \\ \mathbf{v}_B \end{pmatrix} \mapsto \begin{pmatrix} \mathbf{v}_A \\ -\mathbf{v}_B \end{pmatrix}. \quad (22)$$

It is easy to check that for even permutations  $\pi \in S_5$  we have

$$\hat{T}R(\pi) = R(\pi)\hat{T} \quad (23)$$

while for odd permutations  $\pi \in S_5$  we have

$$\hat{T}R(\pi) = -R(\pi)\hat{T} \quad (24)$$

and for spatial inversion  $E^* \in S_5^*$  we have

$$\hat{T}R(E^*) = -R(E^*)\hat{T} \quad (25)$$

so, altogether, we can write

$$\hat{T}R(g) = \left( R_{A_2^-} \otimes R \right) (g) \hat{T} \quad (26)$$

for all  $g \in S_5^*$ , where  $R_{A_2^-}$  is the one-dimensional irrep of  $S_5^*$  which simply gives +1 for even permutations and -1 for odd permutations, and -1 for spatial inversion. Now recall from the previous section that  $\hat{T}$  is a linear bijection from  $V_{-\lambda}$  to  $V_\lambda$ . Equation (26) proves that the representation  $R$  of  $S_5^*$  on  $V_{-\lambda}$  is isomorphic to the representation  $R_{A_2^-} \otimes R$  of  $S_5$  on  $V_\lambda$ , and so establishes the correspondence between the  $S_5^*$  irreps under the map  $\lambda \rightarrow -\lambda$  given in the main text.

## V. COMPARISON OF $\Gamma_{60}$ MODEL PREDICTIONS TO VARIATIONAL NUCLEAR-MOTION COMPUTATIONS

As noted in the main text, the dimensionless ratios

$$\frac{\sqrt{E_1(I^-)} + \sqrt{E_2(I^+)}}{\sqrt{E_1(H_1^+) + \sqrt{E_2(H_2^-)}}, \frac{\sqrt{E_1(H_2^+) + \sqrt{E_2(H_1^-)}}}{\sqrt{E_1(H_1^+) + \sqrt{E_2(H_2^-)}}, \dots \quad (27)$$

are all equal to 1 in the  $\Gamma_{60}$  model. This compares very favourably with the variational seven-dimensional model [2–4] results

$$\frac{\sqrt{E_1(A_1^+) + \sqrt{E_2(A_2^-)}}}{\sqrt{E_1(H_1^+) + \sqrt{E_2(H_2^-)}}} \approx \frac{\sqrt{0} + \sqrt{198}}{\sqrt{20} + \sqrt{139}} \approx 0.86, \quad (28)$$

$$\frac{\sqrt{E_1(G_2^-)} + \sqrt{E_2(G_1^+)}}{\sqrt{E_1(H_1^+)} + \sqrt{E_2(H_2^-)}} \approx \frac{\sqrt{10} + \sqrt{154}}{\sqrt{20} + \sqrt{139}} \approx 0.95, \quad (29)$$

$$\frac{\sqrt{E_1(H_2^-)} + \sqrt{E_2(H_1^+)}}{\sqrt{E_1(H_1^+)} + \sqrt{E_2(H_2^-)}} \approx \frac{\sqrt{41} + \sqrt{122}}{\sqrt{20} + \sqrt{139}} \approx 1.07, \quad (30)$$

$$\frac{\sqrt{E_1(G_1^+)} + \sqrt{E_2(G_2^-)}}{\sqrt{E_1(H_1^+)} + \sqrt{E_2(H_2^-)}} \approx \frac{\sqrt{49} + \sqrt{113}}{\sqrt{20} + \sqrt{139}} \approx 1.08, \quad (31)$$

$$\frac{\sqrt{E_1(I^-)} + \sqrt{E_2(I^+)}}{\sqrt{E_1(H_1^+)} + \sqrt{E_2(H_2^-)}} \approx \frac{\sqrt{58} + \sqrt{112}}{\sqrt{20} + \sqrt{139}} \approx 1.12, \quad (32)$$

and

$$\frac{\sqrt{E_1(H_2^+)} + \sqrt{E_2(H_1^-)}}{\sqrt{E_1(H_1^+)} + \sqrt{E_2(H_2^-)}} \approx \frac{\sqrt{59} + \sqrt{114}}{\sqrt{20} + \sqrt{139}} \approx 1.12. \quad (33)$$

- [1] G. Berkolaiko and P. Kuchment, “Introduction to quantum graphs,” in *Mathematical Surveys and Monographs*, Vol. 186 (American Mathematical Society, 2013).
- [2] X.-G. Wang and T. Carrington Jr., *J. Chem. Phys.* **129**, 234102 (2008).
- [3] X.-G. Wang and T. Carrington, *J. Chem. Phys.* **144**, 204304 (2016).
- [4] C. Fábri, M. Quack, and A. G. Császár, *J. Chem. Phys.* **147**, 134101 (2017).
- [5] C. Fábri and A. G. Császár, *Phys. Chem. Chem. Phys.* **20**, 16913 (2018).
- [6] J. I. Rawlinson, *J. Chem. Phys.* **151**, 164303 (2019).
